# Supplementary figures and images for: Economic burden of cardiovascular diseases in the enlarged European Union
Source: Oxford University Press journal article supplement (doi:10.1093/eurheartj/ehi733), 2006-02-22

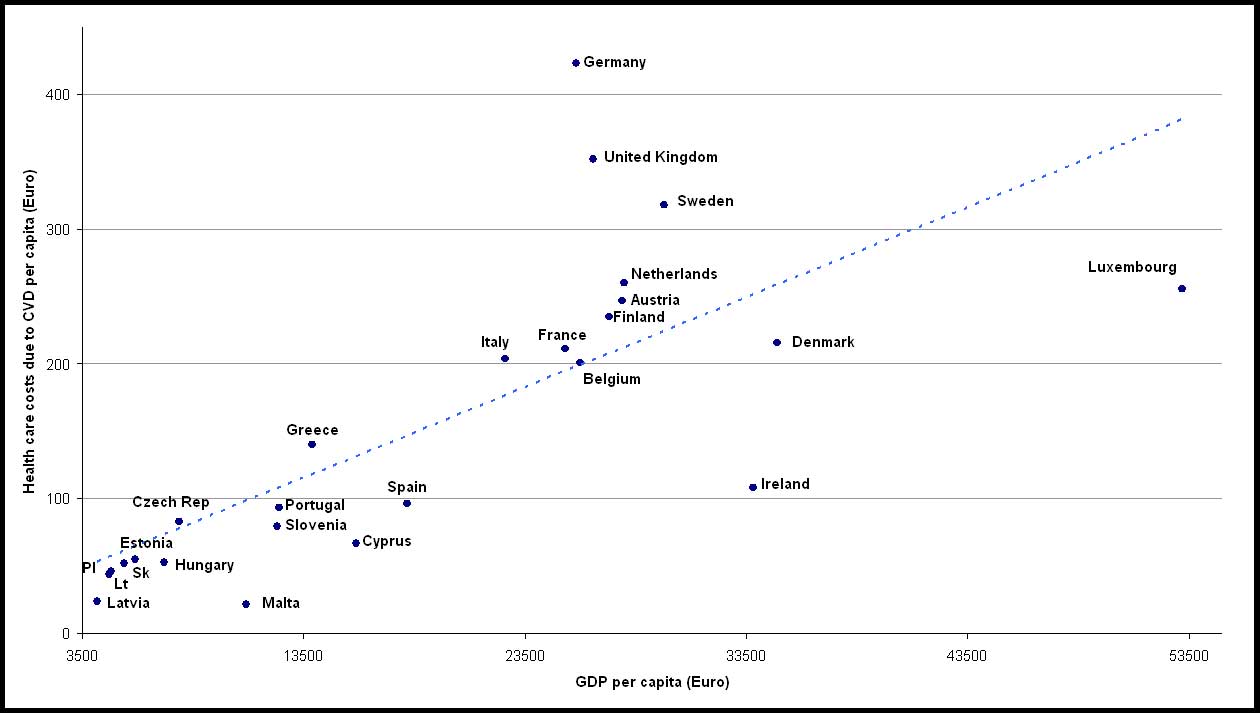

Supplement: ehi733_Supplementary_Data.zip [file ehi733_Supplementary_Data.zip › ehi733Figure_1_suppl_data.jpg]
